# Supplementary material
Source: publisher figshare collection journal article supplement (https://acs.figshare.com/ndownloader/files/7656340)
Supplement: Supplementary file 1 [file 7656340]

# **Regioselective Molecularly Imprinted Reaction Field for [4+4] Photocyclodimerization of 2-Anthracenecarboxylic Acid**

Satoshi Nakai<sup>1</sup>, Hirobumi Sunayama<sup>1</sup>, Yukiya Kitayama<sup>1</sup>, Masaki Nishijima<sup>2</sup>, Takehiko Wada<sup>3</sup>,  
Yoshihisa Inoue<sup>4</sup>, Toshifumi Takeuchi<sup>1\*</sup>

\*takeuchi@gold.kobe-u.ac.jp

<sup>1</sup> Graduate School of Engineering, Kobe University, 1-1, Rokkodai-cho, Nada-ku, Kobe 657-8501,  
Japan

<sup>2</sup> Office for University-Industry Collaboration, Osaka University, Yamada-oka, Suita, 565-0871,  
Japan

<sup>3</sup> Institute of Multidisciplinary Research for Advanced Materials (IMRAM), Tohoku University,  
2-1-1, Katahira, Aoba-ku, Sendai, Miyagi, 980-8577, Japan

<sup>4</sup> Department of Applied Chemistry, Osaka University, Yamada-oka, Suita, 565-0871, Japan.

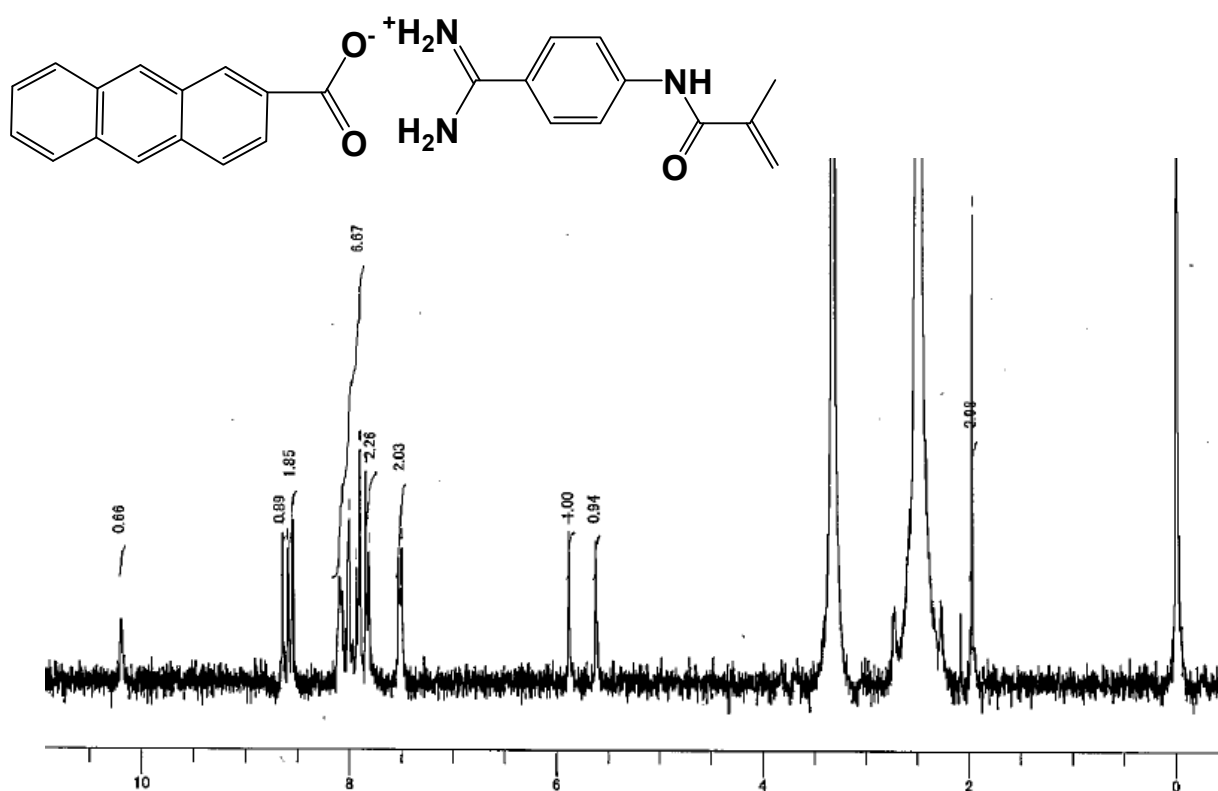

Figure S1  $^1\text{H}$ -NMR spectrum of the obtained template molecule in  $\text{DMSO}-d_6$

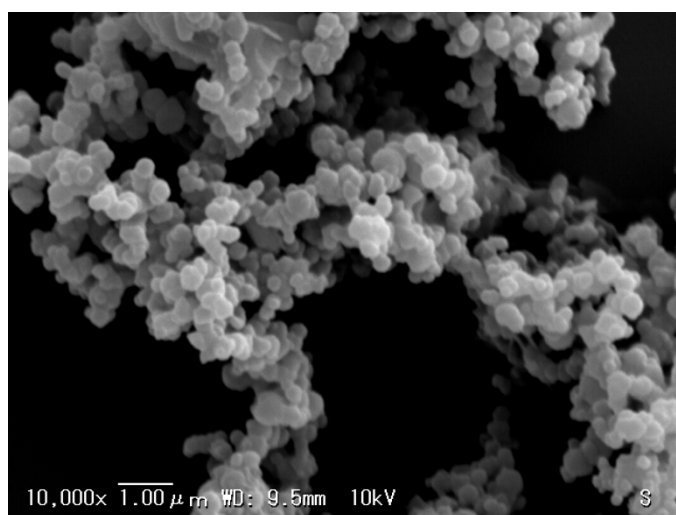

Figure S2 SEM image of the MIP particles prepared by the precipitation polymerization of template molecules and EGDM with V-70 as an initiator in methanol at  $30^\circ\text{C}$  for 24 h.

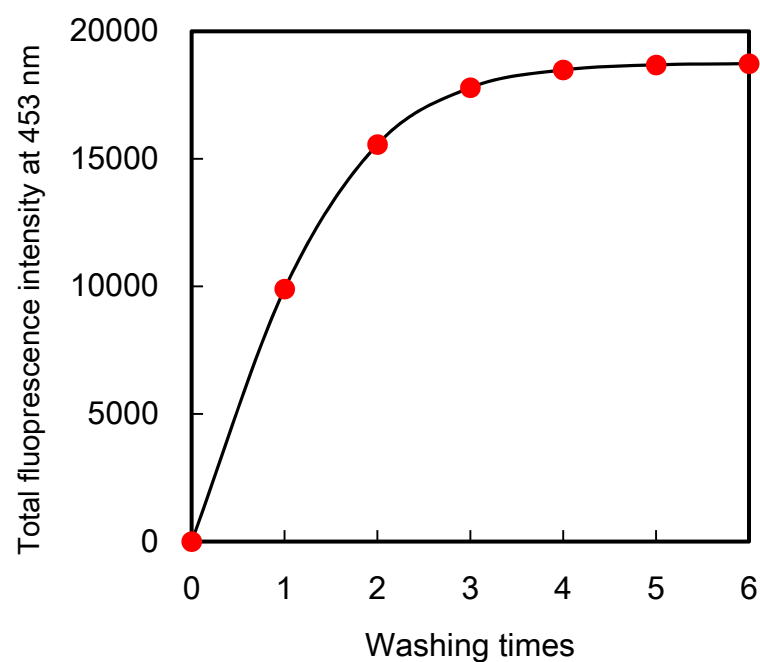

Figure S3 Total fluorescence intensities at 453 nm (Excitation wavelength: 365 nm) at various washing times of the obtained polymer particles using centrifugation with methanol containing 10 % acetic acid.

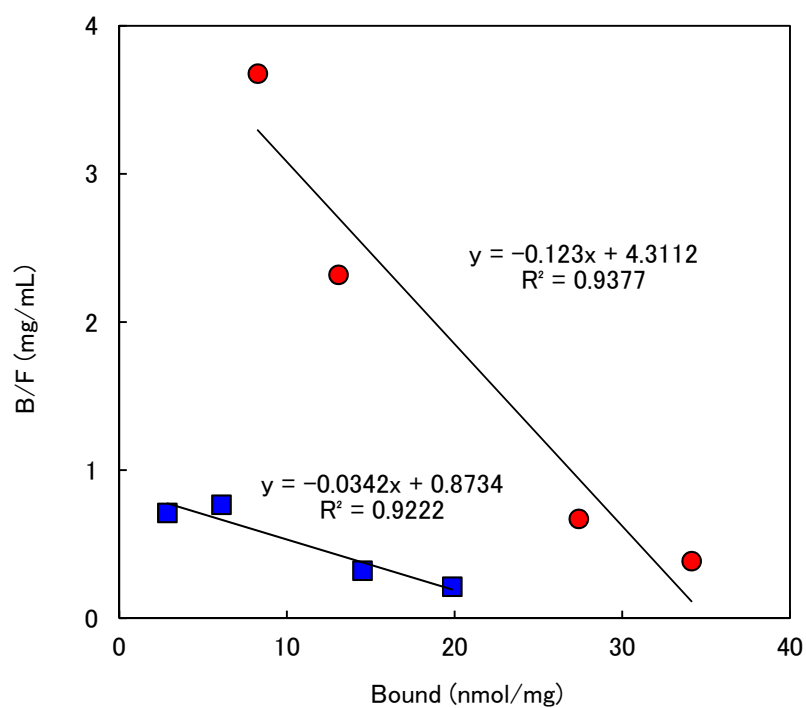

Figure S4 Scatchard plots of binding experiments of 2-AC and 9-AC towards MIP particles.

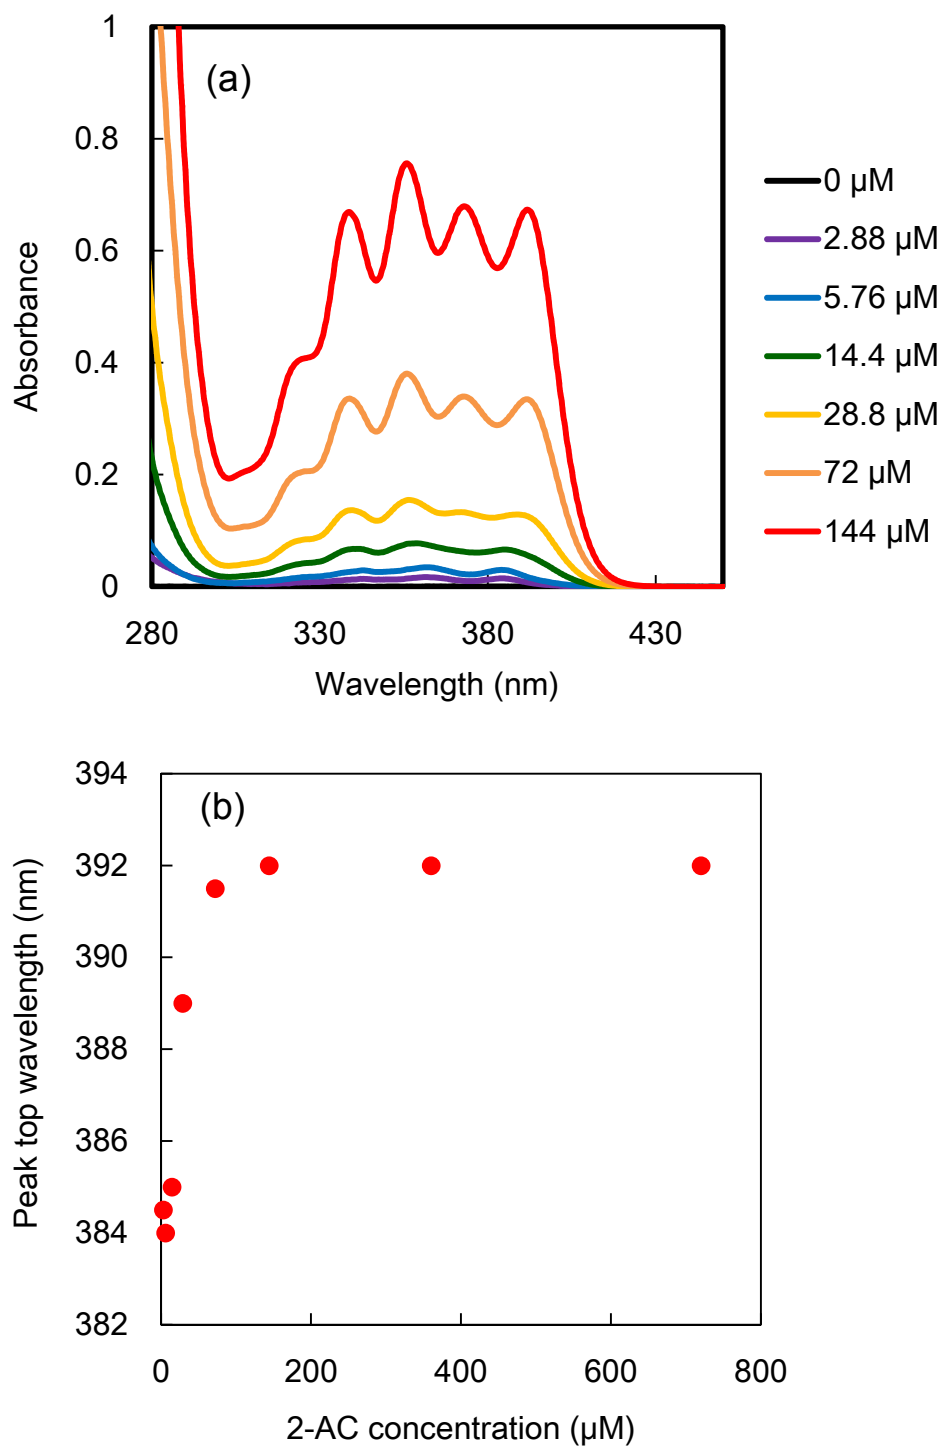

Figure S5 UV-Vis spectra (a) and the peak top wavelength (b) of various concentrations of 2-AC in methanol

Table1 S1 The molar fractions for the *anti*-HT, *syn*-HT, *anti*-HH, and *syn*-HH dimers caused upon photocyclodimerization in the presence and absence of MIP particles; average of three independent runs

|             | <i>anti</i> -HT (%) | <i>syn</i> -HT (%) | <i>anti</i> -HH (%) | <i>syn</i> -HT (%) |
|-------------|---------------------|--------------------|---------------------|--------------------|
| With MIP    | 35.0 $\pm$ 0.5      | 27.1 $\pm$ 0.9     | 20.0 $\pm$ 0.9      | 17.0 $\pm$ 0.5     |
| Without MIP | 32.8 $\pm$ 0.8      | 26.4 $\pm$ 0.7     | 21.4 $\pm$ 0.2      | 19.4 $\pm$ 0.3     |
